# Supplementary material for: Diverse responses of hypoxia-inducible factor alpha mRNA abundance in fish exposed to low oxygen: the importance of reporting methods
Source: Frontiers journal article supplement (doi:10.3389/fphys.2024.1496226), 2024-10-04

**Figure S1.** Summary of **(A)** *HIF*A genes and **(B)** tissues sampled in studies reviewed here. In each panel, the wedges represent the proportion of studies examining each *HIF*A gene or tissue. The number of studies and the number of discrete sampling points are shown in parentheses (studies; samples). For panel **(A)**, all forms of each gene are combined (ancestral and teleost-specific duplicates). For panel **(B)**, “Other” represents one sample each from spleen, swim bladder, and testis.

**A**

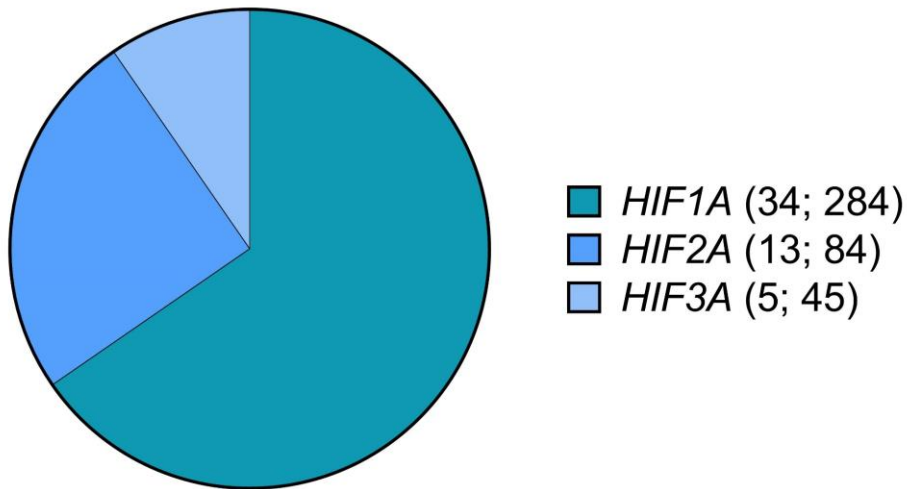

**B**

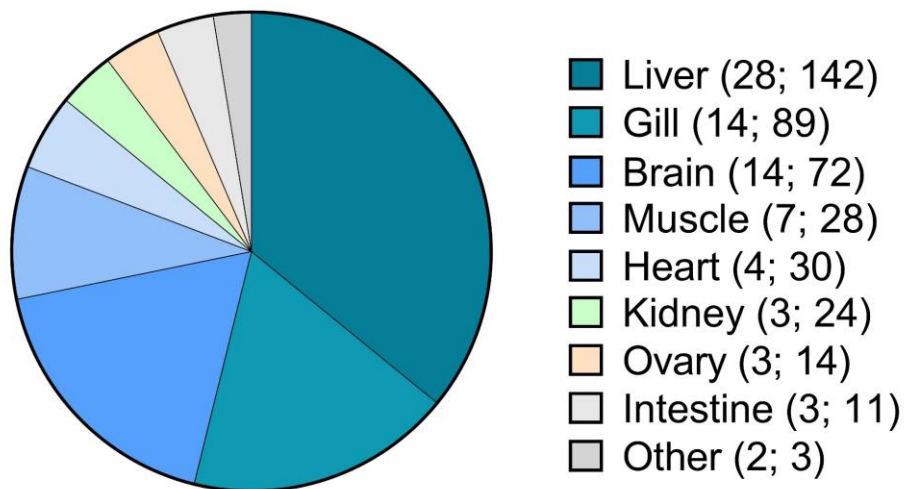

**Figure S2.** Results of generalized linear mixed effect model analysis of the effects of cumulative oxygen deficit on the predicted frequency of **(A)** *HIF2A* and **(B)** *HIF3A* mRNA increases during hypoxic exposure of fishes. The effect of COD was not significant for *HIF2A* ( $P = 0.296$ ) or *HIF3A* ( $P = 0.749$ ). See Tables S6 and S7 for complete statistical outputs.

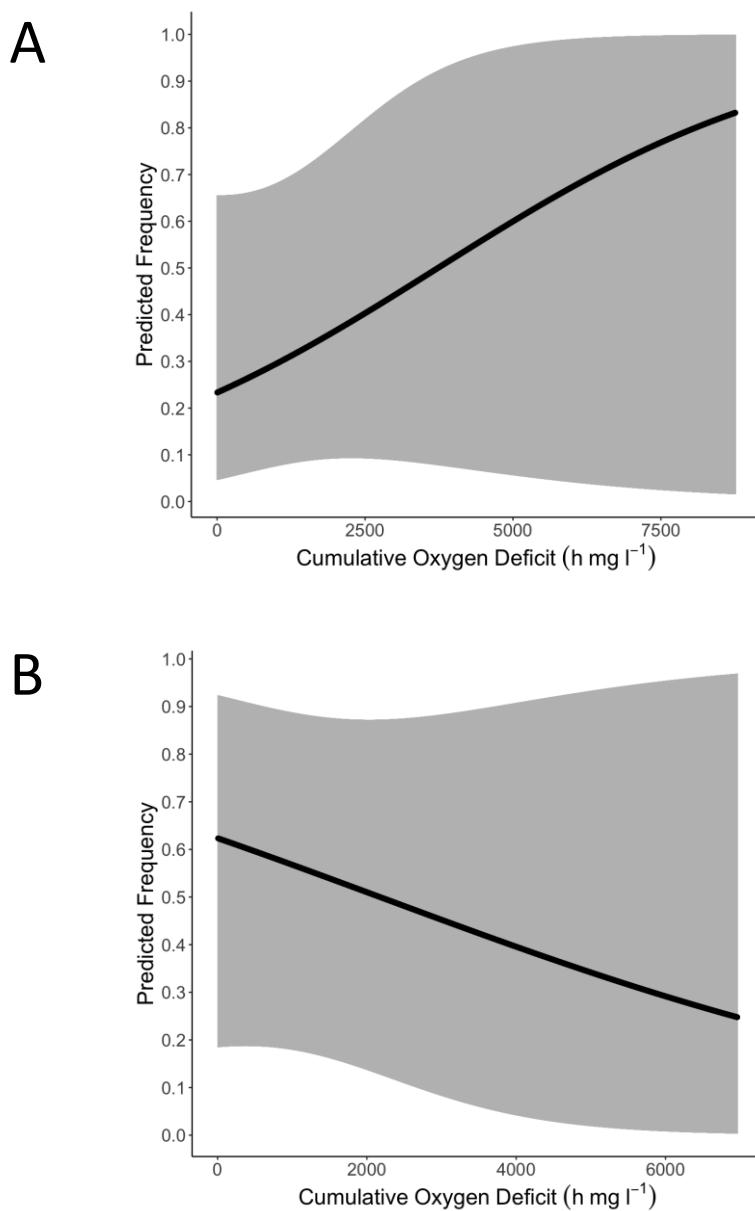

**Figure S3.** Results of generalized linear mixed effect model analysis of the effects of methods reporting on the predicted frequency of **(A)** *HIF2A* and **(B)** *HIF3A* mRNA increases during hypoxic exposure of fishes. Models included the number of essential MIQE criteria as a fixed effect and study as a random effect. The effect of MIQE score was not significant for *HIF2A* ( $P = 0.127$ ) but it approached statistical significance for *HIF3A* ( $P = 0.0547$ ). See Tables S9 and S10 for complete statistical outputs.

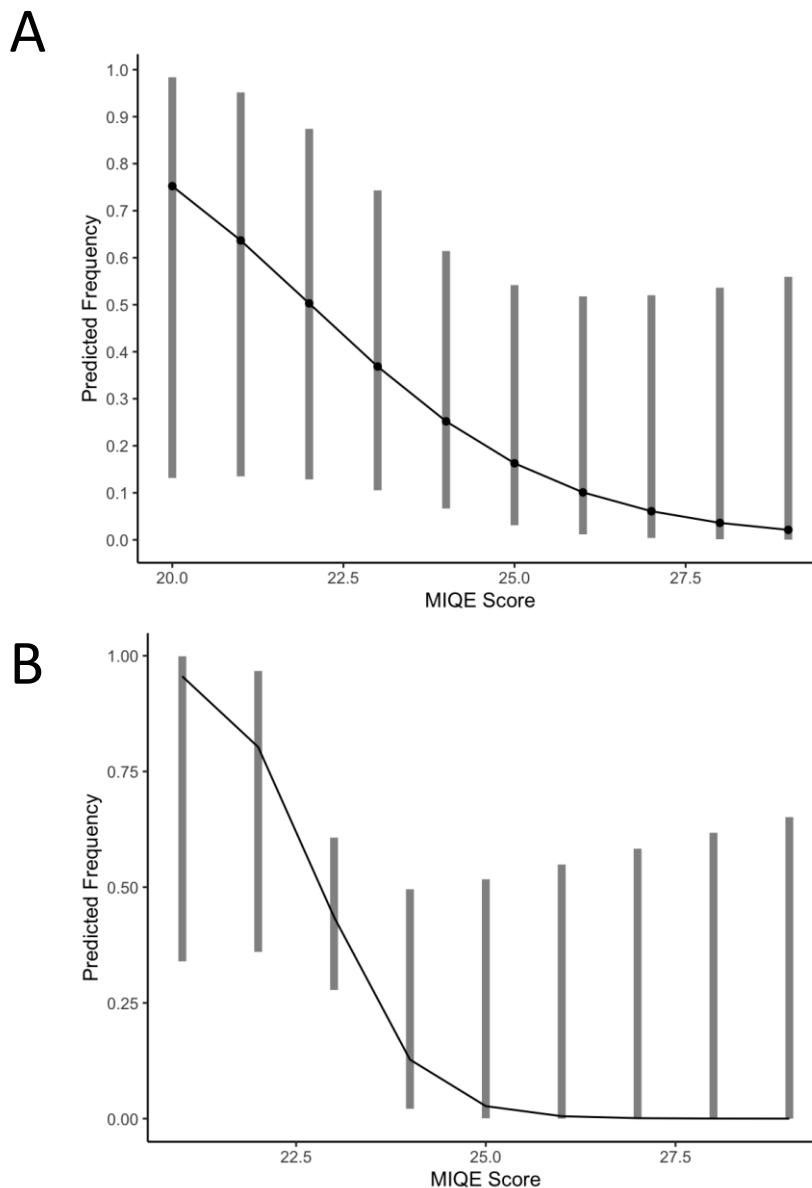

Supplement: Image_1.PDF [file Image_1.PDF]
